# Supplementary material for: Gene Silencing Mediated by siRNA-binding Fusion Proteins Is Attenuated by Double-stranded RNA-binding Domain Structure
Source: PubMed Central journal article supplement — Mol Ther Nucleic Acids. 2012 Nov 13;1(11):e53–. doi: 10.1038/mtna.2012.43 (PMC3511671; doi:10.1038/mtna.2012.43), 2012-11-13
Supplement: mtna201243x4.pdf [file mtna201243x4.pdf]

# Supplemental Figure 4

PTD/Cell Targeting peptide, DRBD Motif 1, DRBD Motif 2, HA Tag

## DRBD

MAGDLSAGFFMEELNTYRQKQGVLKYQELPNSGPPHRRFTFQVIIDGREFPEGEGRS  
KKEAKNAAAKLAVEILNKEKKA AALEHHHHHHH

## PTD-DRBD

MG**RKKRRQRRR**GHSG**RKKRRQRRR**GHIYPYD**VPDY**AGDPGR**RKKRRQRRR**GDPAGDLS  
AGFFMEELNTYRQKQGVLKYQELPNSGPPHRRFTFQVIIDGREFPEGEGRSKKEAKNA  
AAKLAVEILNKEKKA AALEHHHHHHH

## PPS-DRBD

MG**DSPAHP**SGHSG**DSPAHP**GHIG**DSPAHP**GAPAGDLSAGFFMEELNTYRQKQGVL  
KYQELPNSGPPHRRFTFQVIIDGREFPEGEGRSKKEAKNAAAKLAVEILNKEKKA AALE  
HHHHHHH

## 2xDRBD

MGAPAGDLSAGFFMEELNTYRQKQGVLKYQELPNSGPPHRRFTFQVIIDGREFPEGE  
GRSKKEAKNAAAKLAVEILNKEKKA VSPLLLTTTNSSEGL**SMGNYIGLINRIAQKKRLTVNY**  
**EQCASGVHGPEGFHYKCKMGQKEYSIGTGSTKQEAQQLAAKLAYLQILSEETS**SVKSDHH  
HHHH

## PTD-2xDRBD

MG**RKKRRQRRR**GHSG**RKKRRQRRR**GHIYPYD**VPDY**AGDPGR**RKKRRQRRR**GAPAGDLS  
AGFFMEELNTYRQKQGVLKYQELPNSGPPHRRFTFQVIIDGREFPEGEGRSKKEAKN  
AAAKLAVEILNKEKKA VSPLLLTTTNSSEGL**SMGNYIGLINRIAQKKRLTVNYEQCASGVHG**  
**PEGFHYKCKMGQKEYSIGTGSTKQEAQQLAAKLAYLQILSEETS**SVKSDHHHHHHH

## PPS-2xDRBD

MG**DSPAHP**SGHSG**DSPAHP**GHIG**DSPAHP**GAPAGDLSAGFFMEELNTYRQKQGVLK  
YQELPNSGPPHRRFTFQVIIDGREFPEGEGRSKKEAKNAAAKLAVEILNKEKKA VSPLLL  
TTNSSEGL**SMGNYIGLINRIAQKKRLTVNYEQCASGVHGPEGFHYKCKMGQKEYSIGTGS**  
**TKQEAQQLAAKLAYLQILSEETS**SVKSDHHHHHHH

## Supplemental Figure 4, cont.

### 1xTAT-2xDRBD

MG**RKKRRQRRR**GAPAGDLSAGFFMEELNTYRQKQGVLKYQELPNSGPPHRRRFTFQVI  
IDGREFPEGEGRSKKEAKNAAAKLAVEILNKEKKAVSPLLLTTTNSSEG**LSMGNYIGLINRIA**  
**QKKRLTVNYEQCASGVHGPEGFHYKCKMGQKEYSIGTGSTKQEAQQLAAKLAYLQILSEE**  
TSVKSDHHHHHH

### Pen-2xDRBD

M**GRQIKIWFQNRRMKWKK**GGSGGSGGSGGSGGSGGSGGSGGSGGAPAGDLSAGFFME  
ELNTYRQKQGVLKYQELPNSGPPHRRRFTFQVIIDGREFPEGEGRSKKEAKNAAAKLAV  
EILNKEKKAVSPLLLTTTNSSEG**LSMGNYIGLINRIAQKKRLTVNYEQCASGVHGPEGFHYK**  
**CKMGQKEYSIGTGSTKQEAQQLAAKLAYLQILSEETS**SVKSDHHHHHH

### B2-2xDRBD

MG**GHKVKRPKG**GHSG**GHKVKRPKG**GHIG**GHKVKRPKG**GAPAGDLSAGFFMEELNTYRQ  
KQGVLKYQELPNSGPPHRRRFTFQVIIDGREFPEGEGRSKKEAKNAAAKLAVEILNKEKK  
AVSPLLLTTTNSSEG**LSMGNYIGLINRIAQKKRLTVNYEQCASGVHGPEGFHYKCKMGQKE**  
**YSIGTGSTKQEAQQLAAKLAYLQILSEETS**SVKSDHHHHHH

**Supplemental Fig. 3.** Primary amino acid sequence of each of fusion protein. TAT or receptor/cell targeting motifs are shown in red. PKR DRBD motif 1 is shown in blue and DRBD motif 2 in orange. The HA epitope is in green, and linker regions and the six-histidine tags are shown in black.
